# Supplementary material for: Robust enzyme discovery and engineering with deep learning using CataPro
Source: Springer Nature journal article supplement (doi:10.1038/s41467-025-58038-4), 2025-03-20
Supplement: MOESM1 [file 41467_2025_58038_MOESM1_ESM.pdf]

## Supplementary Information

Zeichen Wang<sup>1</sup>, Dongqi Xie<sup>2</sup>, Dong Wu<sup>2</sup>, Xiaozhou Luo<sup>3,4,5</sup>, Sheng Wang<sup>2</sup>,

Yangyang Li<sup>1</sup>, Yanmei Yang<sup>6</sup>, Weifeng Li<sup>1</sup>, Liangzhen Zheng<sup>2,7</sup>

<sup>1</sup> School of Physics, Shandong University, Jinan, 250100, Shandong, China.

<sup>2</sup> Shanghai Zelixir Biotech Co. Ltd, Shanghai, 201210, Shanghai, China.

<sup>3</sup> Shenzhen Key Laboratory for the Intelligent Microbial Manufacturing of Medicines, Shenzhen Institute of Advanced Technology, Chinese Academy of Sciences, Shenzhen, 518055, Guangdong, China.

<sup>4</sup> Key Laboratory of Quantitative Synthetic Biology, Shenzhen Institute of Advanced Technology, Chinese Academy of Sciences, Shenzhen, 518055, Guangdong, China.

<sup>5</sup> Center for Synthetic Biochemistry, Shenzhen Institute of Advanced Technology, Chinese Academy of Sciences, Shenzhen, 518055, Guangdong, China.

<sup>6</sup> College of Chemistry, Chemical Engineering and Materials Science, Key Laboratory of Molecular and Nano Probes, Ministry of Education, Shandong Normal University, Jinan, 250014, Shandong, China.

<sup>7</sup> Shenzhen Zelixir Biotech Co. Ltd, Hengtaiyu Park, Shenzhen, 518107, Guangdong, China.

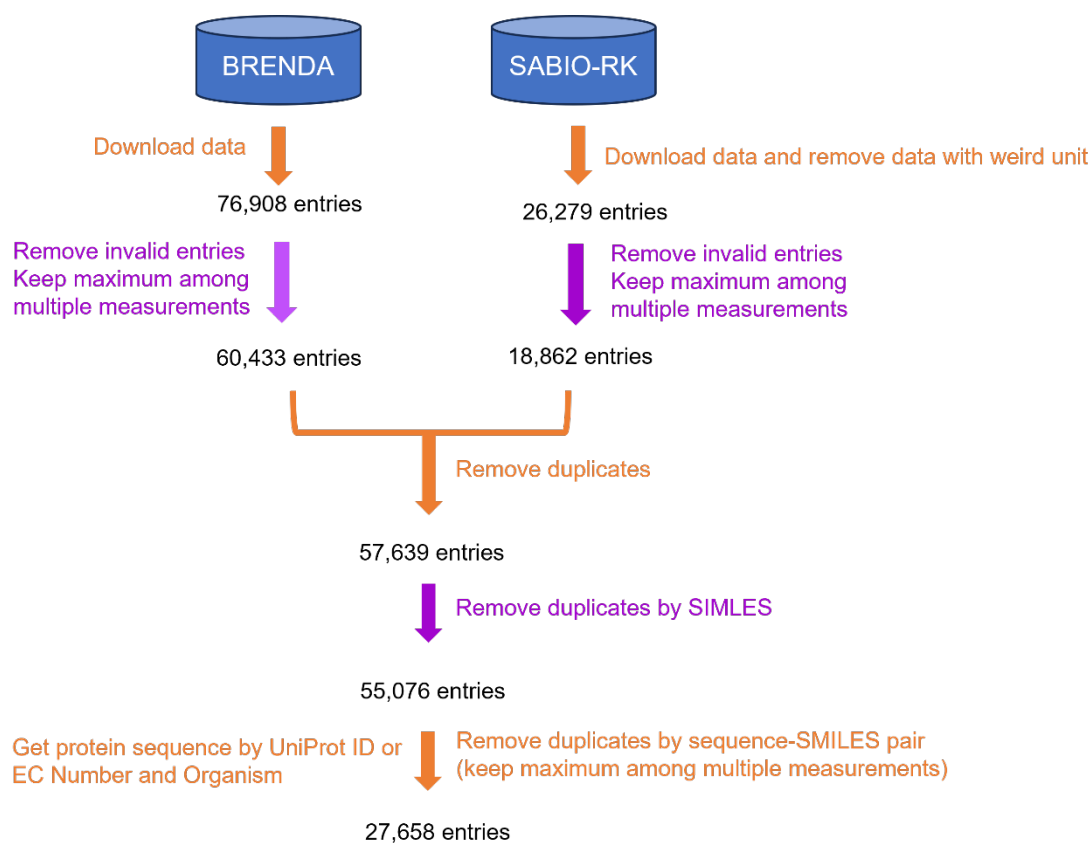

**Supplementary Figure 1.** The collection and cleaning process for  $k_{\text{cat}}$  entries.

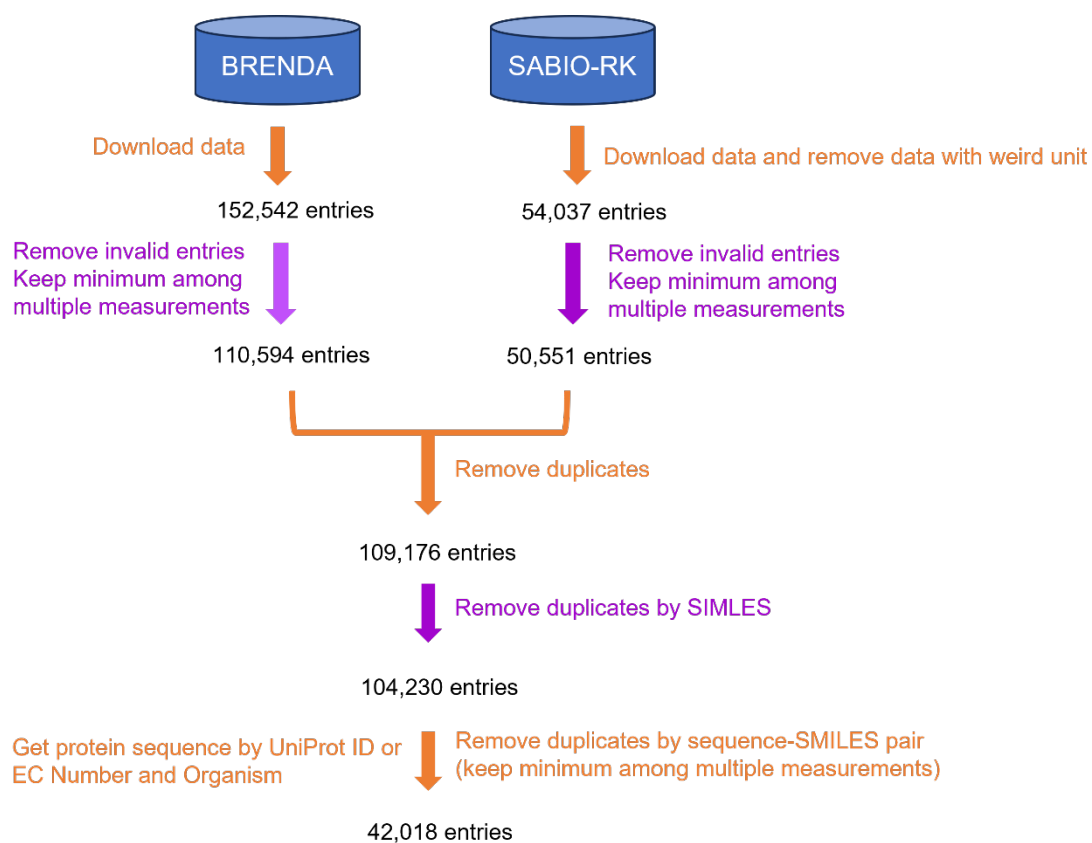

**Supplementary Figure 2.** The collection and cleaning process for  $K_m$  entries.

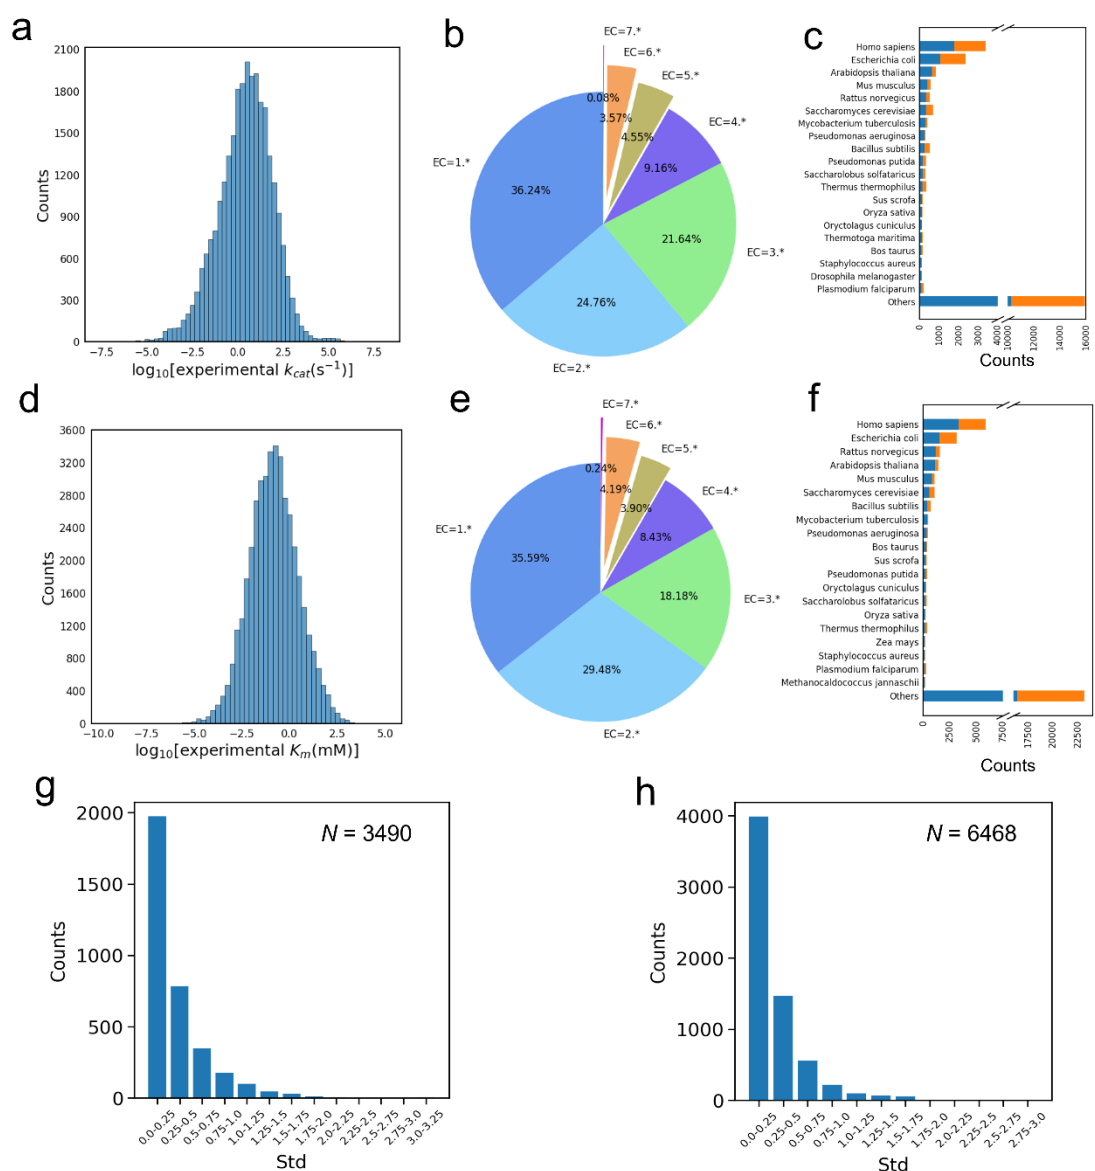

**Supplementary Figure 3. Analysis of the processed  $k_{\text{cat}}$  and  $K_m$  data.** **a,d** Distribution of  $k_{\text{cat}}$  and  $K_m$  values. **b,e** Classification of enzymes in the  $k_{\text{cat}}$  and  $K_m$  datasets based on the first digit of the EC number. **c,f** Species distribution of data in the  $k_{\text{cat}}$  and  $K_m$  datasets. **g,h** Distribution of samples across different label noise intervals in the  $k_{\text{cat}}$  and  $K_m$  databases. “Std” represents the standard deviation. Source data are provided as a Source Data file.

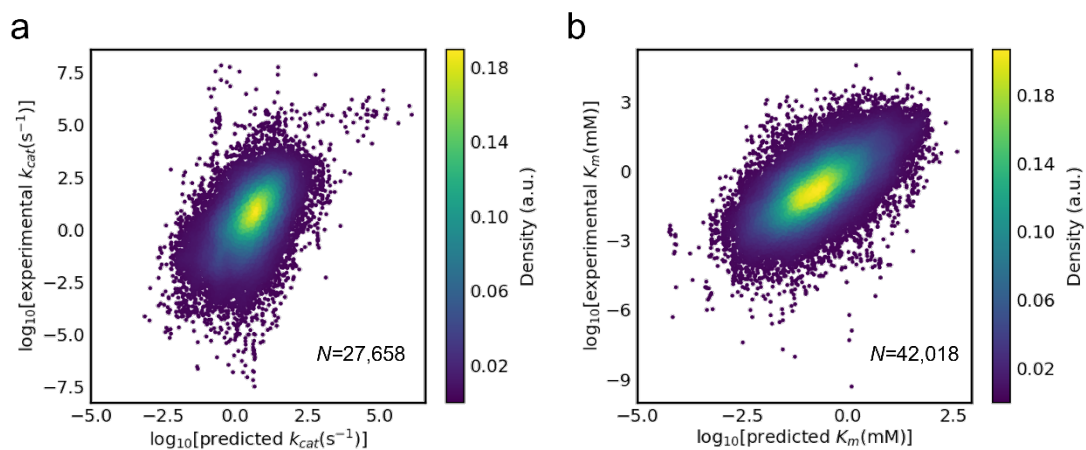

**Supplementary Figure 4.** Scatter plots of predicted values from CataPro and experimental values on the (a)  $k_{\text{cat}}$  and (b)  $K_m$  datasets. Source data are provided as a Source Data file.

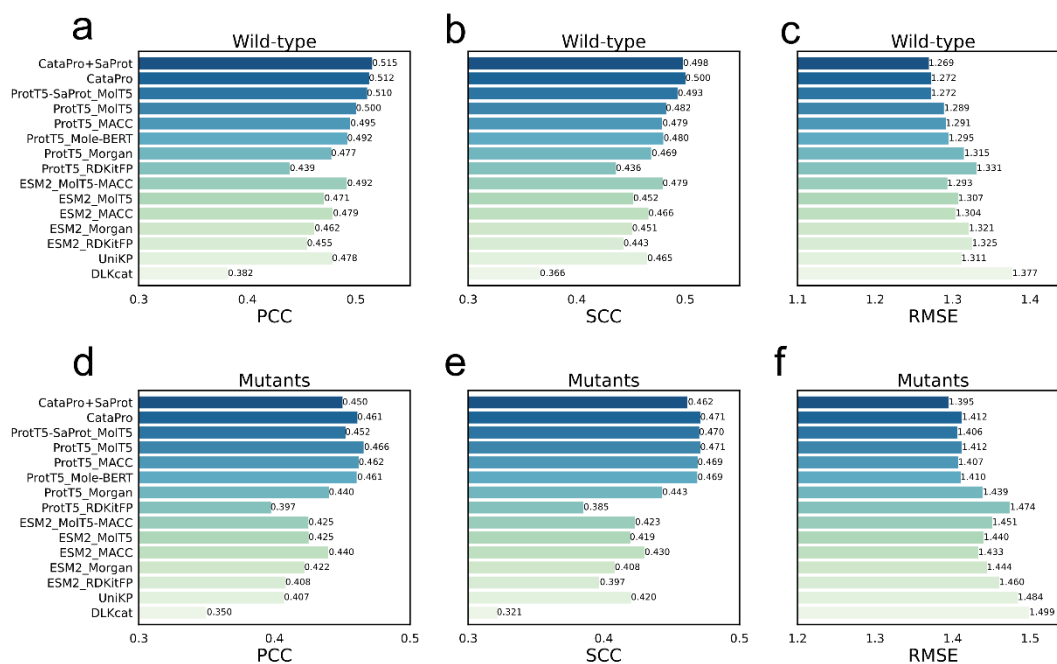

**Supplementary Figure 5. Comparison of models on the  $k_{\text{cat}}$  wild-type and mutant subsets.** **a-c** Performance of models on the wild-type samples in the  $k_{\text{cat}}$  dataset in terms of PCC, SCC, and RMSE. **d-f** Performance of the models on the mutant enzyme samples in the  $k_{\text{cat}}$  dataset in terms of PCC, SCC, and RMSE. Source data are provided as a Source Data file.

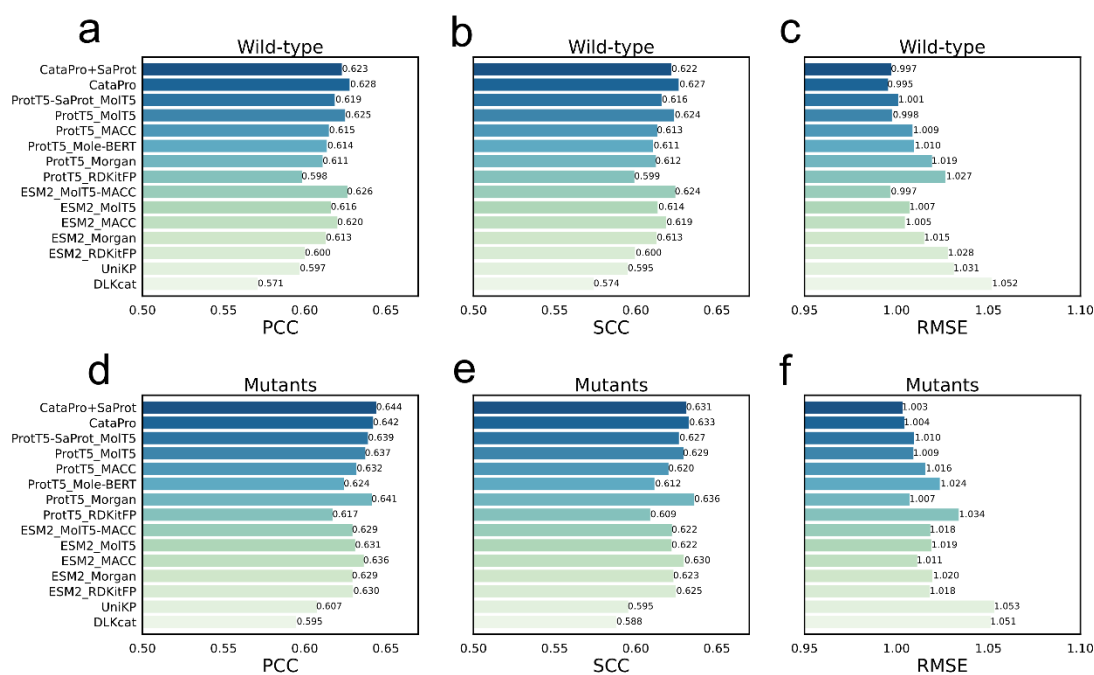

**Supplementary Figure 6. Comparison of models on the  $K_m$  wild-type and mutant subsets.** **a-c** Performance of models on the wild-type samples in the  $K_m$  dataset in terms of PCC, SCC, and RMSE. **d-f** Performance of the models on the mutant enzyme samples in the  $K_m$  dataset in terms of PCC, SCC, and RMSE. Source data are provided as a Source Data file.

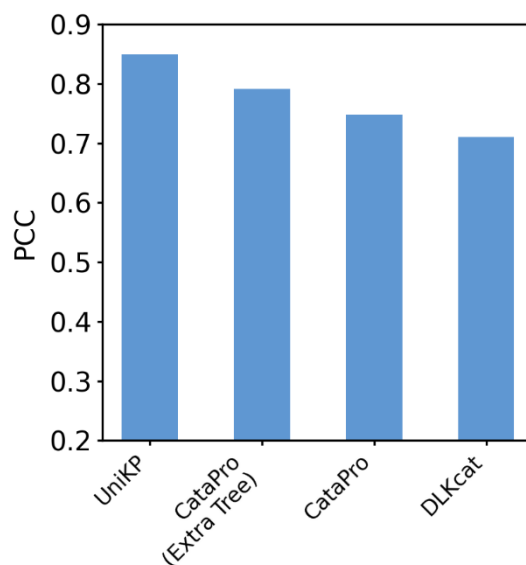

**Supplementary Figure 7.** Performance of CataPro on the  $k_{\text{cat}}$  dataset collected by Li et al. In accordance with the literature, 1,684 samples were randomly selected as the test set, with the remaining samples used for training and validation of CataPro. The Pearson correlation coefficients (PCC) achieved by CataPro and CataPro (extra tree) were 0.748 and 0.791, respectively, compared to 0.71 and 0.85 reported for DLKcat and UniKP. Source data are provided as a Source Data file.



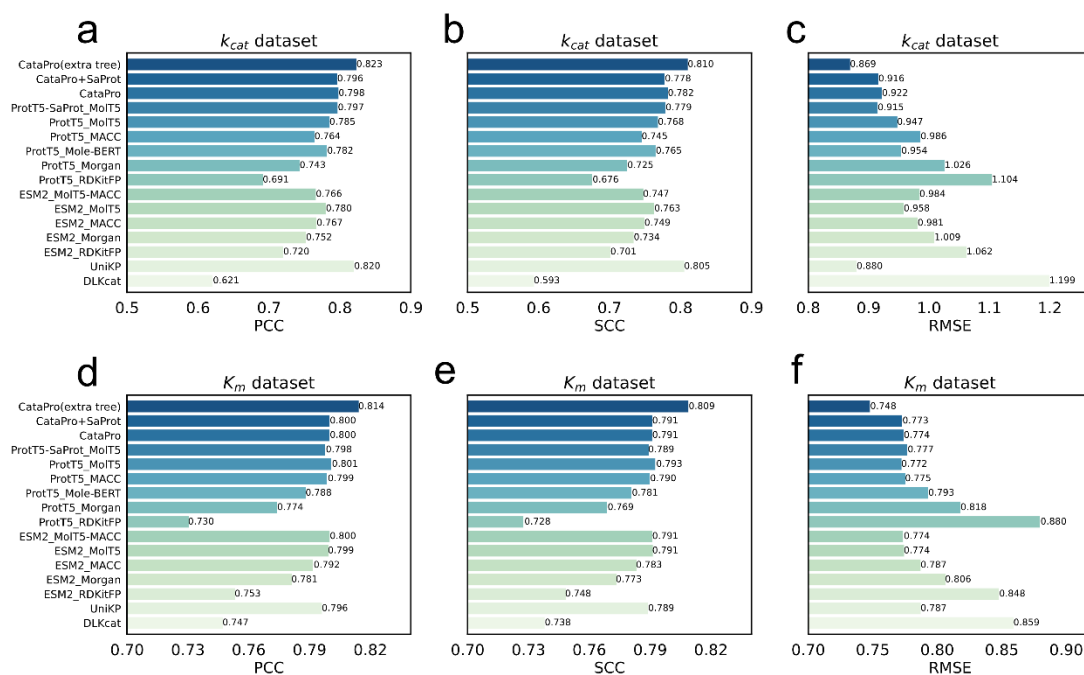

**Supplementary Figure 8. Comparison of models on randomly-split 10-fold cross-validation datasets of  $k_{cat}$  and  $K_m$ .** **a-c** PCC, SCC, and RMSE achieved by models on the  $k_{cat}$  dataset. **d-f** PCC, SCC, and RMSE achieved by models on the  $K_m$  dataset. CataPro (extra tree) represents the use of extra trees, instead of neural networks, to fit the features of CataPro and labels. Source data are provided as a Source Data file.

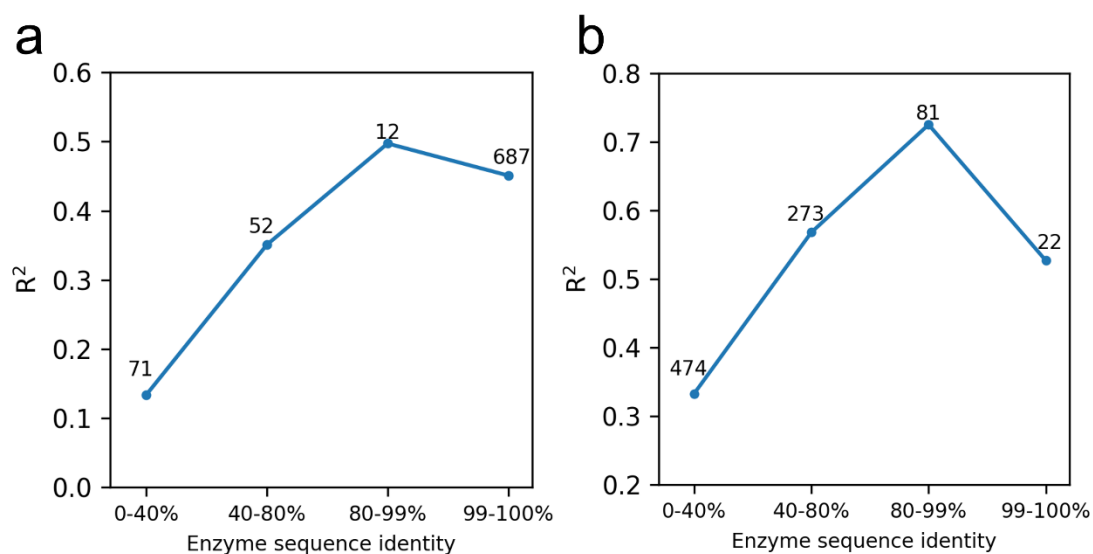

**Supplementary Figure 9. Performance of CataPro and the retrained CataPro on the TurNuP test set.** **a** The performance of CataPro on the TurNuP test set across four subsets, which were divided based on the maximum sequence identity to enzyme sequences in the CataPro  $k_{\text{cat}}$  dataset. **b** The performance of the retrained CataPro on the four subsets of the TurNuP test set, which are consistent with those in the original TurNuP paper. The number of samples in each subset is shown above each point. Source data are provided as a Source Data file.

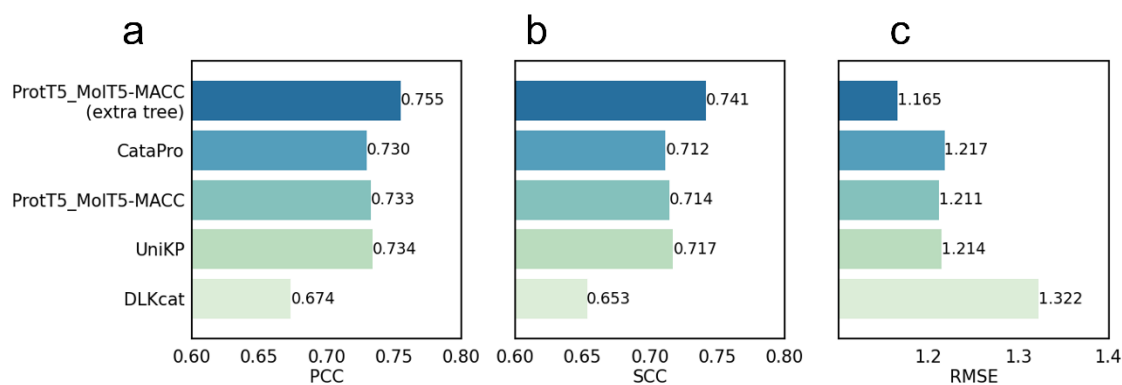

**Supplementary Figure 10. Performance of models on randomly-split 10-fold cross-validation datasets of  $k_{cat}/K_m$ .** a-c show the PCC, SCC, and RMSE achieved by models, respectively. ProtT5\_MolT5-MACC (extra tree) represents the use of extra trees, instead of neural networks, to fit the features of “ProtT5+MolT5+MACC” and labels. Source data are provided as a Source Data file.

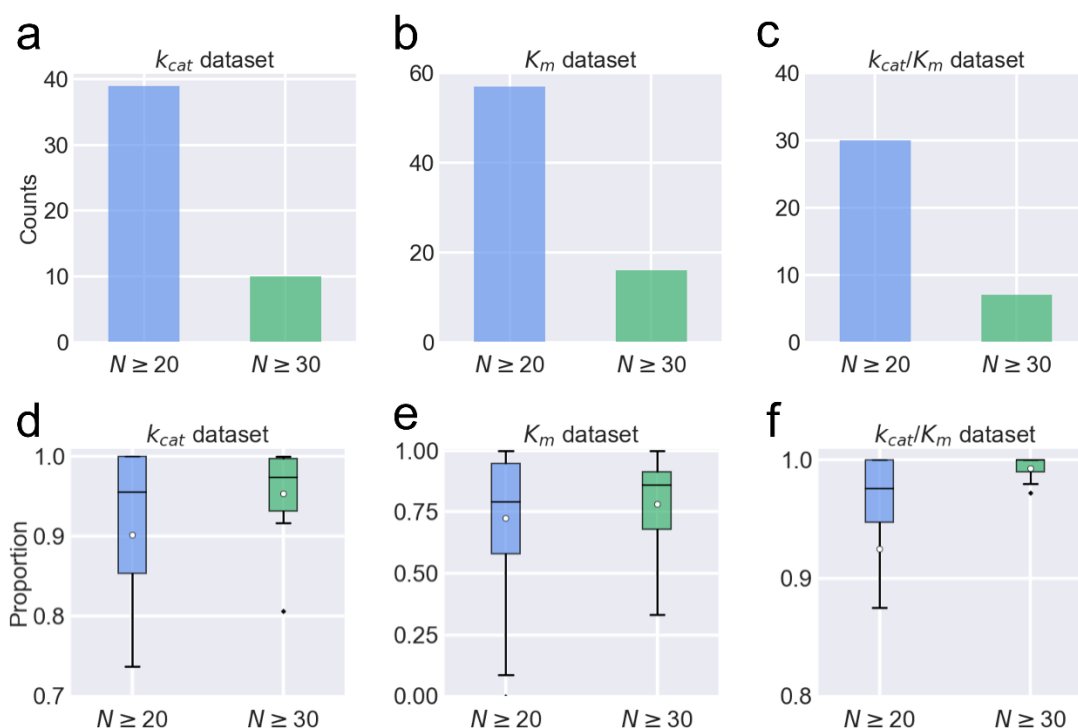

**Supplementary Figure 11. Statistics on the number of reactions in the three datasets with more than 20 or 30 mutants and the proportion of disadvantageous mutants.** **a-c** The number of reactions that meet the criteria  $N \geq 20$  or  $N \geq 30$  in the  $k_{cat}$ ,  $K_m$ , and  $k_{cat}/K_m$  datasets. **d-f** The proportion distribution of disadvantageous mutations among all mutants in a reaction (with the same UniProtID-SMILES pair) that meets the criteria  $N \geq 20$  or  $N \geq 30$  in the  $k_{cat}$ ,  $K_m$ , and  $k_{cat}/K_m$  datasets. In panels d-f, the lower and upper boundaries of the box represent the first quartile (Q1) and the third quartile (Q3), respectively. The whiskers extend from the quartiles to the minimum and maximum values within 1.5 times the interquartile range. The white circle represents the mean value of each statistic and the black line inside the box represents the median. Source data are provided as a Source Data file.

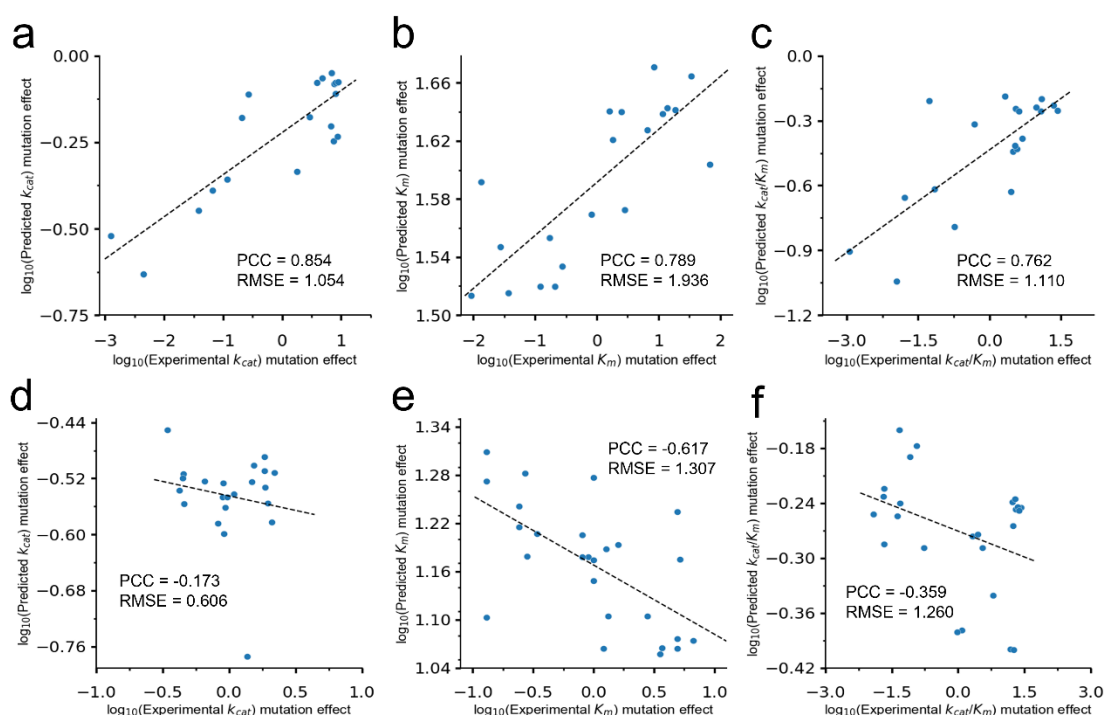

**Supplementary Figure 12. Predictions of CataPro in representative enzymatic reactions.** **a**, **b**, and **c** show the enzymatic reactions with the highest correlation in predicting mutation effects by CataPro on the  $k_{cat}$ ,  $K_m$ , and  $k_{cat}/K_m$  datasets, with the corresponding enzyme (UniProt ID)-substrate pairs being (Q9UKK9, ADP-D-ribose), (P50384, Anthranilate), and (Q9UKK9, ADP-D-ribose), respectively. **d**, **e**, and **f** show the enzymatic reactions with the lowest correlation in predicting mutation effects by CataPro on the  $k_{cat}$ ,  $K_m$ , and  $k_{cat}/K_m$  datasets, with the corresponding enzyme (UniProt ID)-substrate pairs being (P13956, S-Adenosyl-L-methionine), (P26276, alpha-D-Glucose 1-phosphate), and (P51570, ATP), respectively. Source data are provided as a Source Data file.

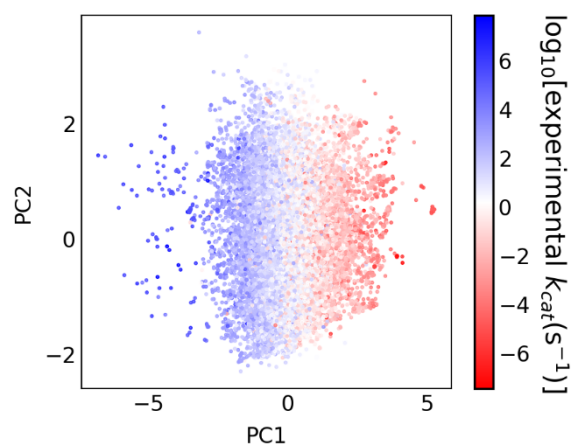

**Supplementary Figure 13.** Principal component analysis of the embedding extracted by the  $k_{\text{cat}}$  model. The color bar represents the experimentally measured  $k_{\text{cat}}$  values. Source data are provided as a Source Data file.

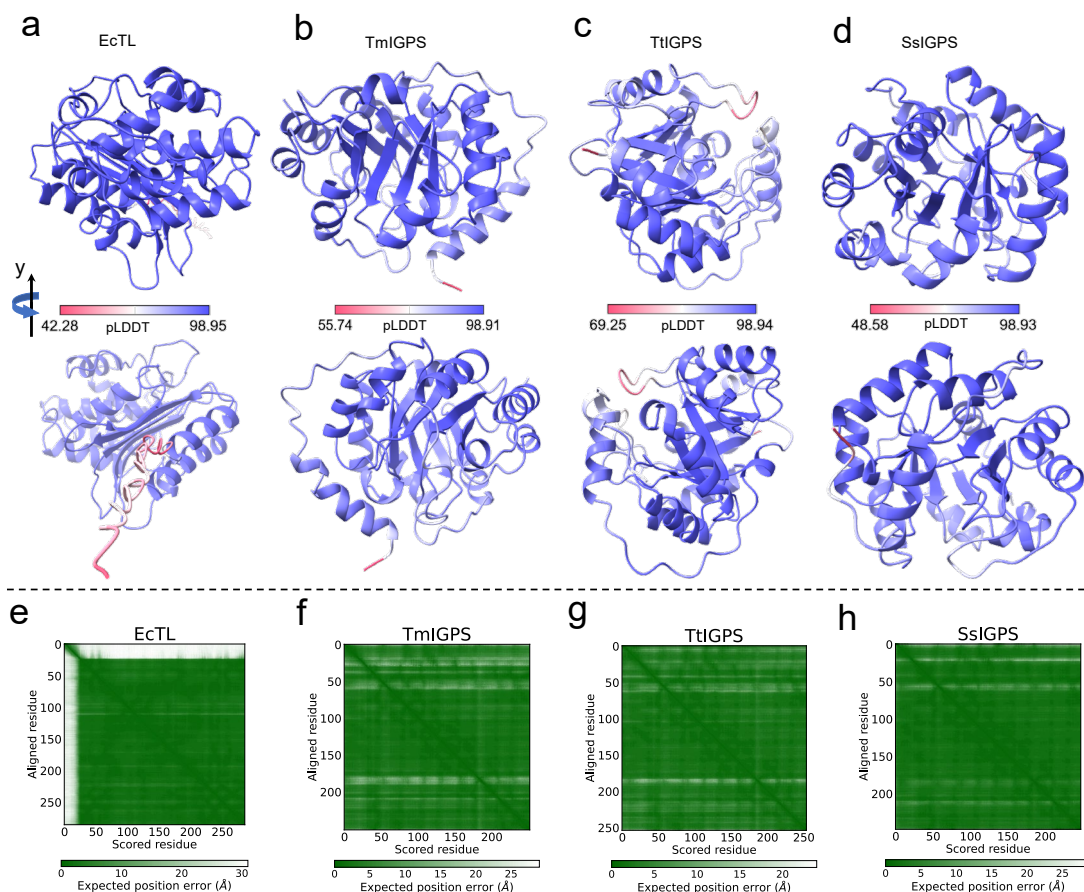

**Supplementary Figure 14. Accuracy of protein structures in the DMS datasets generated by AlphaFold2.** **a-d** respectively show the pLDDT of EcTL, TmIGPS, TtIGPS, and SsIGPS from two perspectives, with the lower view in each panel obtained by rotating the upper view 180 degrees around y-axis. **e-h** show the Predicted Aligned Error (PAE) of these four AlphaFold2 structures. The structures, pLDDT, and PAE of these four proteins are all from the AlphaFold Database.

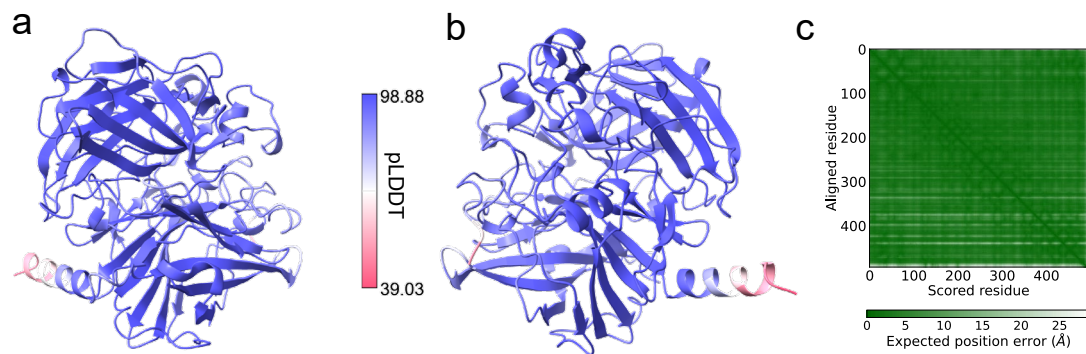

**Supplementary Figure 15. Accuracy of SsCSO protein structures generated by AlphaFold2.** **a,b** show the pLDDT from two perspectives. The view in panel **b** is obtained by rotating the view in panel **a** 180 degrees around the y-axis. **c** shows the Predicted Aligned Error (PAE) of the SsCSO AlphaFold2 structure.



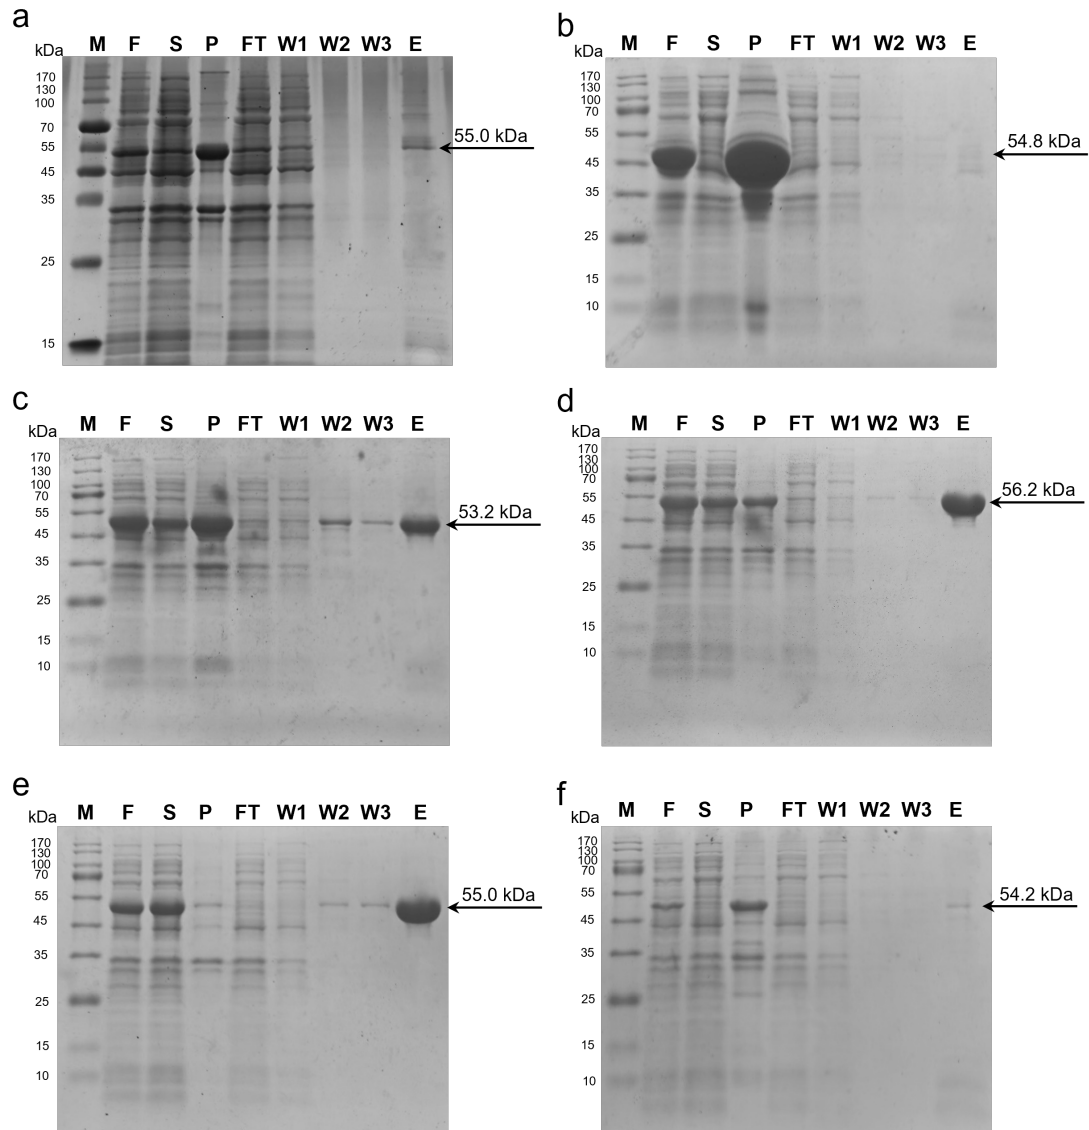

**Supplementary Figure 16. SDS-PAGE analysis of CSO enzymes purified by affinity chromatography.** a-f show the SDS-PAGE results of CSO2, PpCSO, MgpCSO, PgCSO, SsCSO, and TkCSO, respectively. Notes: F: fresh culture supernatant; S: supernatant after centrifugation; P: pellet after centrifugation; FT: flow-through from nickel column; W1: wash fraction 1 from nickel column; W2: wash fraction 2 from nickel column; W3: wash fraction 3 from nickel column; E: elution of protein using Elution buffer; M: protein molecular weight marker. The molecular weight indicated by the arrow on the right side of each panel was calculated using the molecular weight calculation tool at [https://www.bioinformatics.org/sms/prot\\_mw.html](https://www.bioinformatics.org/sms/prot_mw.html).

**Supplementary Table 1.** Ability of the models to rank mutants on the  $k_{\text{cat}}$ ,  $K_{\text{m}}$ , and  $k_{\text{cat}}/K_{\text{m}}$  datasets

| SCC of<br>CataPro/UniKP/DLKcat | N=20                |                    | N=30                |                     |
|--------------------------------|---------------------|--------------------|---------------------|---------------------|
|                                | mean                | medium             | mean                | Medium              |
| $k_{\text{cat}}$               | 0.284/-0.016/-0.061 | 0.265/-0.029/0.012 | 0.177/-0.076/0.027  | 0.161/-0.113/0.081  |
| $K_{\text{m}}$                 | 0.123/0.073/0.048   | 0.147/0.044/0.078  | 0.166/0.058/0.073   | 0.160/-0.040/0.053  |
| $k_{\text{cat}}/K_{\text{m}}$  | 0.299/0.018/-0.099  | 0.317/0.010/-0.095 | 0.169/-0.018/-0.093 | 0.169/-0.011/-0.066 |

Note: The values in the table represent the SCC achieved by CataPro/UniKP/DLKcat.

**Supplementary Table 2.** Accuracy of the models in selecting the better-performing mutant from two mutants on the  $k_{\text{cat}}$ ,  $K_{\text{m}}$ , and  $k_{\text{cat}}/K_{\text{m}}$  datasets

| Accuracy of<br>CataPro/UniKP/DLKcat | N=20              |                   | N=30              |                   |
|-------------------------------------|-------------------|-------------------|-------------------|-------------------|
|                                     | mean              | medium            | mean              | Medium            |
| $k_{\text{cat}}$                    | 0.604/0.494/0.480 | 0.600/0.490/0.508 | 0.560/0.471/0.509 | 0.555/0.457/0.532 |
| $K_{\text{m}}$                      | 0.543/0.525/0.516 | 0.551/0.518/0.527 | 0.558/0.519/0.521 | 0.554/0.484/0.514 |
| $k_{\text{cat}}/K_{\text{m}}$       | 0.604/0.505/0.462 | 0.613/0.497/0.458 | 0.542/0.493/0.463 | 0.546/0.496/0.474 |

Note: The values in the table represent the accuracy achieved by CataPro/UniKP/DLKcat.

**Supplementary Table 3.** Performance of the models in the global analysis of mutation effects.

| Performance of<br>CataPro/UniKP/DLKcat | N=20               |                   | N=30               |                   |
|----------------------------------------|--------------------|-------------------|--------------------|-------------------|
|                                        | PCC                | RMSE              | PCC                | RMSE              |
| $k_{\text{cat}}$                       | 0.055/0.000/-0.002 | 1.081/1.204/1.264 | 0.034/-0.005/0.001 | 1.088/1.085/1.109 |
| $K_{\text{m}}$                         | 0.005/0.010/0.005  | 0.977/1.000/0.977 | 0.007/0.012/0.007  | 0.924/0.997/0.924 |
| $k_{\text{cat}}/K_{\text{m}}$          | 0.037/0.001/-0.001 | 1.391/1.443/1.417 | 0.022/0.002/0.001  | 1.491/1.506/1.375 |

Note: The values in the table represent the PCC and RMSE achieved by CataPro/UniKP/DLKcat.

**Supplementary Table 4.** The SCC achieved by  $k_{\text{cat}}$ ,  $K_{\text{m}}$ , and  $k_{\text{cat}}/K_{\text{m}}$  models of CataPro on the DMS datasets

|        |                                 | Fold-1       | Fold-2       | Fold-3       | Fold-4       | Fold-5       | Fold-6       | Fold-7       | Fold-8       | Fold-9       | Fold-10      | Ensemble |
|--------|---------------------------------|--------------|--------------|--------------|--------------|--------------|--------------|--------------|--------------|--------------|--------------|----------|
| EcTL   | $k_{\text{cat}}$                | 0.360        | 0.319        | 0.410        | 0.364        | 0.367        | 0.438        | 0.363        | 0.413        | <b>0.392</b> | 0.352        | 0.399    |
|        | $K_{\text{m}}$                  | 0.172        | 0.338        | 0.344        | 0.313        | 0.323        | <b>0.361</b> | 0.093        | 0.007        | 0.380        | 0.277        | 0.296    |
|        | $k_{\text{cat}} / K_{\text{m}}$ | 0.390        | 0.396        | 0.440        | 0.309        | 0.335        | 0.374        | 0.203        | <b>0.437</b> | 0.373        | 0.384        | 0.398    |
| TmIGPS | $k_{\text{cat}}$                | 0.467        | <b>0.412</b> | 0.471        | 0.469        | 0.447        | 0.469        | 0.477        | 0.405        | 0.395        | 0.439        | 0.472    |
|        | $K_{\text{m}}$                  | 0.288        | 0.109        | 0.158        | <b>0.145</b> | 0.125        | 0.185        | 0.140        | 0.098        | 0.156        | 0.081        | 0.163    |
|        | $k_{\text{cat}} / K_{\text{m}}$ | 0.367        | <b>0.426</b> | 0.390        | 0.410        | 0.435        | 0.421        | 0.418        | 0.433        | 0.330        | 0.379        | 0.430    |
| TtIGPS | $k_{\text{cat}}$                | <b>0.474</b> | <b>0.419</b> | <b>0.449</b> | <b>0.492</b> | <b>0.450</b> | <b>0.456</b> | <b>0.518</b> | <b>0.404</b> | <b>0.458</b> | <b>0.515</b> | 0.495    |
|        | $K_{\text{m}}$                  | <b>0.184</b> | <b>0.156</b> | <b>0.248</b> | <b>0.307</b> | <b>0.297</b> | <b>0.191</b> | <b>0.269</b> | <b>0.187</b> | <b>0.230</b> | <b>0.062</b> | 0.235    |
|        | $k_{\text{cat}} / K_{\text{m}}$ | <b>0.432</b> | <b>0.457</b> | <b>0.404</b> | <b>0.450</b> | <b>0.415</b> | <b>0.419</b> | <b>0.451</b> | <b>0.476</b> | <b>0.428</b> | <b>0.397</b> | 0.465    |
| SsIGPS | $k_{\text{cat}}$                | 0.478        | 0.514        | <b>0.457</b> | 0.512        | 0.479        | 0.440        | 0.556        | 0.479        | 0.532        | 0.505        | 0.535    |
|        | $K_{\text{m}}$                  | 0.340        | 0.283        | <b>0.257</b> | 0.409        | 0.373        | 0.253        | 0.214        | 0.250        | 0.321        | 0.145        | 0.302    |
|        | $k_{\text{cat}} / K_{\text{m}}$ | 0.358        | <b>0.447</b> | 0.415        | 0.489        | 0.434        | 0.426        | 0.434        | 0.462        | 0.393        | 0.386        | 0.456    |

Note:

1. All SCC values for the  $K_{\text{m}}$  dataset are negative. To facilitate comparison, the SCC values for the  $K_{\text{m}}$  dataset are presented as absolute values.
2. **Bolded** values indicate SCC achieved by models in which no protein with sequence similarity greater than 0.5 to the test enzyme was included in the training set.

**Supplementary Table 5.** Relative activities of candidate enzymes discovered during enzyme mining and of SsCSO mutants obtained during enzyme modification

| Step                                             | CSOs              | Relative Activity |
|--------------------------------------------------|-------------------|-------------------|
| Enzyme mining                                    | CSO2              | 1.00              |
|                                                  | PgCSO             | 0.20              |
|                                                  | TkCSO             | 0.53              |
|                                                  | MgpCSO            | 0.73              |
|                                                  | PpCSO             | 1.13              |
|                                                  | SsCSO             | 19.53             |
| First round of enzyme modification<br>for SsCSO  | A43N              | 5.27              |
|                                                  | H250W             | 6.84              |
|                                                  | K134W             | 8.99              |
|                                                  | V58W              | 27.93             |
|                                                  | M351F             | 29.30             |
|                                                  | T216M             | 30.28             |
| Second round of enzyme modification<br>for SsCSO | T216M-M351F-A305D | 6.45              |
|                                                  | T216M-M351F-S280F | 32.62             |
|                                                  | T216M-M351F-S301M | 38.68             |
|                                                  | T216M-M351F-V279M | 52.15             |
|                                                  | T216M-M351F-Q100G | 61.71             |
|                                                  | T216M-M351F-V384G | 65.23             |

Note: The relative activity values in this table represent the activities of candidate enzymes or mutants relative to CSO2.

**Supplementary Table 6.** The hyperparameter options we tested for CataPro, with the final parameters marked in **bold**.

|         | Learning rate                     | Batch size              | Dropout rate                 |
|---------|-----------------------------------|-------------------------|------------------------------|
| Kcat    | <b>0.00001</b> ,0.0001,0.001,0.01 | <b>8</b> ,16,32,64,128  | <b>0.0</b> ,0.1,0.2,0.3,0.4  |
| Km      | <b>0.00001</b> ,0.0001,0.001,0.01 | 8, <b>16</b> ,32,64,128 | 0.0, <b>0.1</b> ,0.2,0.3,0.4 |
| Kcat/Km | 0.00001,0.0001,0.001, <b>0.01</b> | 8, <b>16</b> ,32,64,128 | 0.0, <b>0.1</b> ,0.2,0.3,0.4 |

**Supplementary Table 7.** The hyperparameter options we tested for UniKP, with the final parameters marked in **bold**.

|         | n_estimators             | max_depth                  | min_samples_split | min_samples_leaf | max_features             |
|---------|--------------------------|----------------------------|-------------------|------------------|--------------------------|
| Kcat    | 100,150, <b>200</b> ,250 | 40, <b>80</b> ,120,160,200 | 1,2, <b>4</b> ,8  | 1,2, <b>4</b> ,8 | <b>1.0</b> ,0.8,0.6,0.4  |
| Km      | 100,150,200, <b>250</b>  | 40,80,120,160, <b>200</b>  | 1, <b>2</b> ,4,8  | 1, <b>2</b> ,4,8 | <b>1.0</b> ,0.8,0.6,0.4  |
| Kcat/Km | 100,150, <b>200</b> ,250 | <b>40</b> ,80,120,160,200  | 1,2, <b>4</b> ,8  | <b>1</b> ,2,4,8  | 1.0, <b>0.8</b> ,0.6,0.4 |

**Supplementary Table 8.** The hyperparameter options we tested for DLKcat, with the final parameters marked in **bold**.

|         | radius        | ngram         | dim              |
|---------|---------------|---------------|------------------|
| Kcat    | 0,1, <b>2</b> | <b>1</b> ,2,3 | 5, <b>10</b> ,20 |
| Km      | 0,1, <b>2</b> | <b>1</b> ,2,3 | 5, <b>10</b> ,20 |
| Kcat/Km | 0,1, <b>2</b> | <b>1</b> ,2,3 | 5, <b>10</b> ,20 |

**Supplementary Table 9.** The reagents used in the experiment and their sources

| Name                                   | Source                              |
|----------------------------------------|-------------------------------------|
| PrimeSTAR GXL DNA Polymerase           | Takara                              |
| Hieff Clone® Plus One Step Cloning Kit | Yeasen                              |
| FastDigest DpnI                        | Thermo Scientific                   |
| DNA purification kit                   | Simgen                              |
| PAGE gel quick preparation kit         | Epizyme Biotech                     |
| Tris                                   | Macklin                             |
| 2M HCl                                 | Bolinda                             |
| peptone                                | Oxiod                               |
| yeast powder                           | Oxiod                               |
| agarose                                | Oxiod                               |
| IPTG                                   | Aladdin                             |
| FeCl <sub>2</sub> ·4H <sub>2</sub> O   | Macklin                             |
| Kanamycin sulfate                      | Aladdin                             |
| 2,4-dinitrophenylhydrazine             | Aladdin                             |
| NaOH                                   | Sinopharm Chemical Reagent Co., Ltd |
| NaCl                                   | Sinopharm Chemical Reagent Co., Ltd |
| Imidazole                              | Aladdin                             |
| Na <sub>2</sub> HPO <sub>4</sub>       | Aladdin                             |
| NaH <sub>2</sub> PO <sub>4</sub>       | Aladdin                             |
| Na <sub>2</sub> CO <sub>3</sub>        | Aladdin                             |
| NaHCO <sub>3</sub>                     | Aladdin                             |
| 4-Vinyl Guaiacol                       | Aladdin                             |

**Supplementary Table 10. Primers for enzymes and mutants**

| Site  | Primer Direction | Primer Sequence                            |
|-------|------------------|--------------------------------------------|
| S301M | Forward          | CACCTCGATCTGTGCCTGATGGACACCAATGCTTTTGGTTT  |
| S301M | Reverse          | GCACAGATCGAGGTGAAC                         |
| A43N  | Forward          | GACGGCGCTTTCTTTTCGCAACGTTCCAGATCCAGCTCATCC |
| A43N  | Reverse          | AAAGAAAGCGCCGTCAATC                        |
| A305D | Forward          | TGCCTGTCTGACACCAATGATTTTGGTTTCATGCGCGAGGC  |
| A305D | Reverse          | GGTGTCTGACAGGCACAG                         |
| S280F | Forward          | AAAGGTCGTAATGGTGTGTTTGCTTTCCATCTGGTTAACGC  |
| S280F | Reverse          | ACCATTACGACCTTTAAACC                       |
| V384G | Forward          | CCACTGCCGGGTGGTCCGGGAGGTGTTGCGTTTAACGCTCT  |
| V384G | Reverse          | ACCACCCGGCAGTGGCGGAC                       |
| V279M | Forward          | TTTAAAGGTCGTAATGGTATGTCTGCTTTCCATCTGGTTAAC |
| V279M | Reverse          | ATTACGACCTTTAAACCAGC                       |
| K134W | Forward          | GGTCGCCTCCTCATGACCTGGGAAGATGGCCTCGGCTACCAG |
| K134W | Reverse          | CATGAGGAGGCGACCACC                         |
| H250W | Forward          | GGCGGTGCTCACTGGGCTTGGAACAGGACCTGGAGTCTTG   |
| H250W | Reverse          | CCAGTGAGCACC GCCAGC                        |
| Q100G | Forward          | CGTCGTGCTCTGTTTGGCGGATACCGTAACCCGTTACCGAC  |
| Q100G | Reverse          | AAACAGAGCACGACGCGCAT                       |
| V58W  | Forward          | ATGTTGACGACGACATCTGGCTCTCTGGTGATGGCAT      |
| V58W  | Reverse          | GATGTCGTCGTCGAACATCGGCGGATG                |
| M351F | Forward          | GTTGGCCCACCGGGTGATTTTCCACGCCTCCGTGACG      |
| M351F | Reverse          | ACCCGGTGGGCCAACCAG                         |
| T216M | Forward          | GATCAGCCGTACTGCTCTATGATCCATGACTTCGCTATC    |
| T216M | Reverse          | GCAGTACGGCTGATCGAAC                        |
